# Supplementary material
Source: PubMed Central journal article supplement (PMC4564535)
Supplement: supp_jiv102_jiv102supp_table1.pdf [file supp_jiv102_jiv102supp_table1.pdf]

Supplementary Table 1. EBOV RNA levels in oral, nasal, rectal swabs or blood as measured by RT-qPCR after challenge.

| dpi |                     | Cynomolgus macaques    |                        |                        |                        |                        |    |    |                        |    |    | Rhesus macaques        |                        |    |                        |    |                        |                        |                        |                        |    |                        |    |
|-----|---------------------|------------------------|------------------------|------------------------|------------------------|------------------------|----|----|------------------------|----|----|------------------------|------------------------|----|------------------------|----|------------------------|------------------------|------------------------|------------------------|----|------------------------|----|
|     |                     | A1                     | A2                     | A3                     | A4                     | A5                     | A6 | A7 | A8                     | A9 | B1 | B2                     | C1                     | C2 | C3                     | C4 | D1                     | D2                     | E1                     | E2                     | E3 | F1                     | F2 |
| 0   | Oral <sup>3</sup>   | ND <sup>1</sup>        | ND                     | ND                     | ND                     | ND                     | ND | ND | ND                     | ND | -  | -                      | ND                     | ND | ND                     | ND | ND                     | ND                     | -                      | -                      | -  | -                      | -  |
|     | Nasal <sup>3</sup>  | ND                     | ND                     | ND                     | ND                     | ND                     | ND | ND | ND                     | ND | -  | -                      | ND                     | ND | ND                     | ND | ND                     | ND                     | -                      | -                      | -  | -                      | -  |
|     | Rectal <sup>3</sup> | ND                     | ND                     | ND                     | ND                     | ND                     | ND | ND | ND                     | ND | -  | -                      | ND                     | ND | ND                     | ND | ND                     | ND                     | -                      | -                      | -  | -                      | -  |
|     | Blood <sup>4</sup>  | ND                     | ND                     | ND                     | ND                     | ND                     | ND | ND | ND                     | ND | -  | -                      | -                      | -  | -                      | -  | -                      | -                      | -                      | -                      | -  | -                      | -  |
| 3   | Oral                | ND                     | ND                     | ND                     | ND                     | ND                     | ND | ND | ND                     | ND | -  | 3.20 x 10 <sup>1</sup> | ND                     | ND | ND                     | ND | ND                     | ND                     | ND                     | ND                     | ND | ND                     | -  |
|     | Nasal               | ND                     | ND                     | ND                     | ND                     | ND                     | ND | ND | ND                     | ND | -  | -                      | ND                     | ND | ND                     | ND | ND                     | ND                     | ND                     | ND                     | ND | ND                     | -  |
|     | Rectal              | ND                     | ND                     | ND                     | ND                     | ND                     | ND | ND | ND                     | ND | -  | -                      | ND                     | ND | ND                     | ND | ND                     | ND                     | ND                     | ND                     | ND | ND                     | -  |
|     | Blood               | ND                     | ND                     | ND                     | ND                     | ND                     | ND | ND | ND                     | ND | -  | -                      | ND                     | ND | ND                     | ND | -                      | ND                     | ND                     | ND                     | ND | ND                     | -  |
| 7   | Oral                | ND                     | ND                     | ND                     | ND                     | ND                     | ND | ND | ND                     | ND | ND | 1.42 x 10 <sup>2</sup> | 8.21 x 10 <sup>3</sup> | ND | 4.40 x 10 <sup>1</sup> | ND | -                      | 9.00 x 10 <sup>0</sup> | ND                     | ND                     | ND | 1.22 x 10 <sup>2</sup> |    |
|     | Nasal               | ND                     | ND                     | ND                     | ND                     | ND                     | ND | ND | ND                     | ND | ND | 3.50 x 10 <sup>1</sup> | 1.39 x 10 <sup>4</sup> | ND | -                      | ND | 5.56 x 10 <sup>3</sup> | 2.57 x 10 <sup>2</sup> | ND                     | ND                     | ND | 1.07 x 10 <sup>2</sup> |    |
|     | Rectal              | ND                     | ND                     | ND                     | ND                     | ND                     | ND | ND | ND                     | ND | ND | -                      | 1.85 x 10 <sup>2</sup> | ND | 5.50 x 10 <sup>1</sup> | ND | 7.52 x 10 <sup>2</sup> | 1.80 x 10 <sup>1</sup> | ND                     | ND                     | ND | 8.20 x 10 <sup>1</sup> |    |
|     | Blood               | ND                     | ND                     | ND                     | ND                     | ND                     | ND | ND | ND                     | ND | ND | 2.52 x 10 <sup>6</sup> | 4.28 x 10 <sup>8</sup> | ND | 2.16 x 10 <sup>8</sup> | ND | 1.00 x 10 <sup>7</sup> | 4.40 x 10 <sup>8</sup> | ND                     | ND                     | ND | 3.78 x 10 <sup>7</sup> |    |
| 8   | Oral                | ND                     | ND                     | ND                     | ND                     | ND                     | ND | ND | ND                     | ND |    |                        | ND                     | ND | ND                     | ND |                        |                        | ND                     | ND                     | ND | ND                     | ND |
|     | Nasal               | ND                     | ND                     | ND                     | ND                     | ND                     | ND | ND | ND                     | ND |    |                        | ND                     | ND | ND                     | ND |                        |                        | ND                     | ND                     | ND | ND                     | ND |
|     | Rectal              | ND                     | ND                     | ND                     | ND                     | ND                     | ND | ND | ND                     | ND |    |                        | ND                     | ND | ND                     | ND |                        |                        | ND                     | ND                     | ND | ND                     | ND |
|     | Blood               | ND                     | ND                     | ND                     | ND                     | ND                     | ND | ND | ND                     | ND |    |                        | ND                     | ND | ND                     | ND |                        |                        | ND                     | ND                     | ND | 1.25 x 10 <sup>6</sup> | ND |
| 9   | Oral                | ND                     | ND                     | ND                     | ND                     | ND                     | ND | ND | ND                     | ND |    |                        | 1.93 x 10 <sup>3</sup> | ND | ND                     | ND |                        |                        | ND                     | ND                     | ND | ND                     | ND |
|     | Nasal               | ND                     | ND                     | ND                     | ND                     | ND                     | ND | ND | ND                     | ND |    |                        | 2.58 x 10 <sup>2</sup> | ND | ND                     | ND |                        |                        | ND                     | ND                     | ND | ND                     | ND |
|     | Rectal              | ND                     | ND                     | ND                     | ND                     | ND                     | ND | ND | ND                     | ND |    |                        | 4.87 x 10 <sup>2</sup> | ND | ND                     | ND |                        |                        | ND                     | ND                     | ND | ND                     | ND |
|     | Blood               | ND                     | ND                     | ND                     | ND                     | ND                     | ND | ND | ND                     | ND |    |                        | -                      | ND | ND                     | ND |                        |                        | ND                     | ND                     | ND | 1.03 x 10 <sup>7</sup> | ND |
| 11  | Oral                | ND                     | ND                     | ND                     | ND                     | ND                     | ND | ND | ND                     | ND |    |                        | ND                     | ND | ND                     | ND |                        |                        | ND                     | ND                     | ND | ND                     | ND |
|     | Nasal               | ND                     | ND                     | ND                     | ND                     | ND                     | ND | ND | ND                     | ND |    |                        | ND                     | ND | ND                     | ND |                        |                        | ND                     | ND                     | ND | ND                     | ND |
|     | Rectal              | ND                     | ND                     | ND                     | ND                     | ND                     | ND | ND | ND                     | ND |    |                        | ND                     | ND | ND                     | ND |                        |                        | ND                     | ND                     | ND | ND                     | ND |
|     | Blood               | ND                     | ND                     | 2.36 x 10 <sup>4</sup> | 8.36 x 10 <sup>5</sup> | ND                     | ND | ND | ND                     | ND | ND |                        |                        | ND | ND                     | ND | ND                     |                        |                        | 8.72 x 10 <sup>5</sup> | ND | ND                     | ND |
| 13  | Oral                | ND                     | ND                     | ND                     | ND                     | ND                     | ND | ND | ND                     | ND |    |                        | ND                     | ND | ND                     | ND |                        |                        | ND                     | ND                     | ND | ND                     | ND |
|     | Nasal               | ND                     | ND                     | ND                     | ND                     | ND                     | ND | ND | ND                     | ND |    |                        | ND                     | ND | ND                     | ND |                        |                        | ND                     | ND                     | ND | ND                     | ND |
|     | Rectal              | ND                     | ND                     | ND                     | ND                     | ND                     | ND | ND | ND                     | ND |    |                        | ND                     | ND | ND                     | ND |                        |                        | ND                     | ND                     | ND | ND                     | ND |
|     | Blood               | ND                     | ND                     | 3.04 x 10 <sup>4</sup> | ND                     | ND                     | ND | ND | 1.96 x 10 <sup>5</sup> | ND |    |                        | ND                     | ND | ND                     | ND |                        |                        | ND                     | ND                     | ND | ND                     | ND |
| 14  | Oral                | -                      | -                      | -                      | -                      | -                      | -  | -  | -                      | -  |    |                        | -                      | -  | -                      | -  |                        |                        | -                      | -                      | -  | -                      | -  |
|     | Nasal               | -                      | -                      | -                      | -                      | -                      | -  | -  | -                      | -  |    |                        | -                      | -  | -                      | -  |                        |                        | -                      | -                      | -  | -                      | -  |
|     | Rectal              | -                      | 1.20 x 10 <sup>2</sup> | -                      | -                      | -                      | -  | -  | -                      | -  |    |                        | -                      | -  | -                      | -  |                        |                        | 1.60 x 10 <sup>1</sup> | -                      | -  | -                      | -  |
|     | Blood               | -                      | -                      | -                      | -                      | -                      | -  | -  | -                      | -  |    |                        | -                      | -  | -                      | -  |                        |                        | 1.28 x 10 <sup>2</sup> | -                      | -  | -                      | -  |
| 17  | Oral                | ND                     | ND                     | ND                     | ND                     | ND                     | ND | ND | ND                     | ND |    |                        | ND                     | ND | ND                     | ND |                        |                        | -                      | ND                     | ND | ND                     | ND |
|     | Nasal               | ND                     | ND                     | ND                     | ND                     | ND                     | ND | ND | ND                     | ND |    |                        | ND                     | ND | ND                     | ND |                        |                        | 3.14 x 10 <sup>4</sup> | ND                     | ND | ND                     | ND |
|     | Rectal              | ND                     | ND                     | ND                     | ND                     | ND                     | ND | ND | ND                     | ND |    |                        | ND                     | ND | ND                     | ND |                        |                        | -                      | ND                     | ND | ND                     | ND |
|     | Blood               | ND                     | ND                     | 3.04 x 10 <sup>4</sup> | ND                     | ND                     | ND | ND | 1.96 x 10 <sup>5</sup> | ND |    |                        | ND                     | ND | ND                     | ND |                        |                        | 2.14 x 10 <sup>6</sup> | ND                     | ND | ND                     | ND |
| 21  | Oral                | 4.00 x 10 <sup>0</sup> | -                      | -                      | -                      | -                      | -  | -  | -                      | -  |    |                        | -                      | -  | -                      | -  |                        |                        | -                      | ND                     | ND | ND                     | ND |
|     | Nasal               | 1.70 x 10 <sup>1</sup> | -                      | -                      | 8.00 x 10 <sup>0</sup> | 4.00 x 10 <sup>0</sup> | -  | -  | -                      | -  |    |                        | -                      | -  | -                      | -  |                        |                        | -                      | ND                     | ND | ND                     | ND |
|     | Rectal              | -                      | 6.00 x 10 <sup>0</sup> | -                      | -                      | 1.50 x 10 <sup>1</sup> | -  | -  | -                      | -  |    |                        | -                      | -  | -                      | -  |                        |                        | -                      | ND                     | ND | ND                     | ND |
|     | Blood               | -                      | -                      | -                      | 1.10 x 10 <sup>1</sup> | -                      | -  | -  | -                      | -  |    |                        | -                      | -  | -                      | -  |                        |                        | -                      | ND                     | ND | ND                     | ND |
| 28  | Oral                | -                      | 9.00 x 10 <sup>0</sup> | -                      | -                      | -                      | -  | -  | -                      | -  |    |                        | -                      | -  | -                      | -  |                        |                        | -                      | -                      | -  | -                      | -  |
|     | Nasal               | -                      | -                      | -                      | -                      | -                      | -  | -  | -                      | -  |    |                        | -                      | -  | -                      | -  |                        |                        | -                      | -                      | -  | -                      | -  |
|     | Rectal              | -                      | 3.70 x 10 <sup>1</sup> | -                      | -                      | 9.00 x 10 <sup>0</sup> | -  | -  | -                      | -  |    |                        | -                      | -  | -                      | -  |                        |                        | -                      | -                      | -  | -                      | -  |
|     | Blood               | -                      | -                      | -                      | 2.42 x 10 <sup>1</sup> | -                      | -  | -  | -                      | -  |    |                        | -                      | -  | -                      | -  |                        |                        | -                      | -                      | -  | -                      | -  |

<sup>1</sup> ND (not determined)

<sup>2</sup> - (No virus detected)

<sup>3</sup> Oral, Nasal and Rectal swabs Genome Equivalents (GEQ)/Assay

<sup>4</sup> GEQ/ml
